1 **BERBERINE BRIDGE ENZYME-LIKE OLIGOSACCHARIDE OXIDASES ACT AS**  
2 **ENZYMATIC TRANSDUCERS BETWEEN MICROBIAL GLYCOSIDE HYDROLASES**  
3 **AND PLANT PEROXIDASES**

4 Anna Scortica<sup>a</sup>, Moira Giovannoni<sup>a</sup>, Valentina Scafati<sup>a</sup>, Francesco Angelucci<sup>a</sup>, Felice Cervone<sup>b</sup>,  
5 Giulia De Lorenzo<sup>b</sup>, Manuel Benedetti<sup>a,\*</sup>, Benedetta Mattei<sup>a</sup>

6 <sup>a</sup>Department of Life, Health and Environmental Sciences, University of L'Aquila, 67100  
7 L'Aquila, Italy.

8 <sup>b</sup>Department of Biology and Biotechnology "Charles Darwin", Sapienza University of Rome,  
9 00185 Rome, Italy.

10 \*Corresponding author: manuel.benedetti@univaq.it, Department of Life, Health and  
11 Environmental Sciences, University of L'Aquila, 67100 L'Aquila, Italy; phone +39 0862433272.

12 **ABSTRACT**

13 OG-oxidases (OGOXS) and CD-oxidase (CELLOX) are plant berberine bridge enzyme-like  
14 oligosaccharide oxidases that oxidize oligogalacturonides (OGs) and cellodextrins (CDs), cell wall  
15 fragments with nature of damage-associated molecular patterns (DAMPs). The oxidation of OGs  
16 and CDs attenuates their elicitor activity by concomitantly releasing H<sub>2</sub>O<sub>2</sub>. Here, we demonstrate  
17 that the H<sub>2</sub>O<sub>2</sub> generated downstream of the combined action between a fungal polygalacturonase  
18 and OGOX1 or an endoglucanase and CELLOX can be directed by plant peroxidases (PODs)  
19 either towards a reaction possibly involved in plant defence such as the oxidation of monolignol  
20 or a reaction possibly involved in a developmental event such as the oxidation of auxin (IAA),  
21 pointing to OGOX1 and CELLOX as enzymatic transducers between microbial glycoside  
22 hydrolases and plant PODs.

23

24 **KEYWORDS**

25 Oligosaccharide oxidase, berberine bridge enzyme-like enzyme, glycoside hydrolase, peroxidase,  
26 DAMPs, H<sub>2</sub>O<sub>2</sub>, plant immunity, auxin, lignin.

27 **ABBREVIATIONS:**

28 **ABTS**, 2,2'-azino-bis-(3-ethylbenzothiazoline-6-sulfonic acid)

29 **AnEG**, endoglucanase from *Aspergillus niger* (poly- $\alpha$ -1,4-galacturonide glycanohydrolase, EC  
30 number: 3.2.1.15)

31 **APOD**, anionic peroxidase from ripe tomato fruit (phenolic donor: hydrogen-peroxide  
32 oxidoreductase, EC number: 1.11.1.7)

33 **BBE**, Berberine Bridge Enzyme [(S)-reticuline:oxygen oxidoreductase, EC number: 1.21.3.3]

34 **BBE-I**, Berberine Bridge Enzyme-like

35 **CAT**, catalase from bovine liver (hydrogen-peroxide:hydrogen-peroxide oxidoreductase, EC  
36 number: 1.11.1.6)

37 **CD**, cellodextrin

38 **CELLOX**, cellodextrin-oxidase, CD-oxidase (cellodextrin:oxygen oxidoreductase, EC number:  
39 1.21.3.3)

40 **DAMP**, damage-associated molecular pattern

41 **GH**, glycoside hydrolase

42 **HRP**, horseradish peroxidase VI-A type (phenolic donor: hydrogen-peroxide oxidoreductase, EC  
43 number: 1.11.1.7)

44 **IAA**, indole-3-acetic acid, auxin

45 **OG**, oligogalacturonide

46 **OGOx**, oligogalacturonide-oxidase, OG-oxidase (oligogalacturonide:oxygen oxidoreductase,  
47 EC number: 1.21.3.3)

48 **FpPG**, endopolygalacturonase from *Fusarium phyllophilum* (poly- $\alpha$ -1,4-galacturonide  
49 glycanohydrolase, EC number: 3.2.1.15)

50 **POD**, peroxidase (phenolic donor: hydrogen-peroxide oxidoreductase, EC number: 1.11.1.7)

51 **MAIN MANUSCRIPT BODY**

52 Plants are constantly menaced by a wide array of pathogens. Against them, plants evolved a robust  
53 barrier composed of polysaccharides and phenolic compounds, i.e., the cell wall, and a  
54 sophisticated defence system that can be promptly activated at the occurrence. In order to colonize  
55 the plant tissue, pathogens need firstly to dismantle the cell wall, whose degradation is achieved  
56 through the secretion of cell wall degrading enzymes that include glycoside hydrolases (GHs),  
57 esterases and oxidoreductases (Benedetti et al., 2019; Giovannoni et al., 2020). The enzymatic  
58 hydrolysis of cell wall polysaccharides may result in the transient accumulation of cell wall  
59 fragments such as oligogalacturonides (OGs), cellodextrins (CDs) and other cell wall  
60 oligosaccharides that are quickly perceived by plants as danger signal, i.e., as damage-associated  
61 molecular patterns (DAMPs) (Pontiggia et al., 2020).

62 How plants modulate the amplitude of defences in response to the extent of cell wall  
63 hydrolysis is not known. Cell wall degradation occurs not only upon a microbial attack but is also  
64 necessary for remodelling during development. Therefore, cell wall fragments can also be  
65 generated by endogenous enzymes during the relaxation of the cell wall structures, pointing to the  
66 necessity of a system capable of discriminating an exogenous infection from an endogenous  
67 developmental stimulus. Thus, a system capable of measuring the entity of a cell wall damage  
68 must exist.

69 Some berberine bridge enzyme-like (BBE-1) proteins from *Arabidopsis thaliana* have been  
70 recently identified as specific OG-oxidases (OGOXS) and CD-oxidases (CELLOXS). OGOXS  
71 include four isoforms (OGOXS1-4) encoded by paralogous genes that are capable of oxidizing  
72 galacturonic acid oligomers of different size (OGs), whereas CELLOX oxidizes CDs (Benedetti  
73 et al., 2018; Locci et al., 2019). Structural data of two *Arabidopsis* BBE-1 Monolignol-oxidases  
74 (Daniel et al., 2015; Daniel et al., 2016) as well as 3D structural modeling and amino acid  
75 alignment of the four OGOXS, CELLOX and other plant BBE-1 carbohydrate oxidases allowed to

76 identify features important for oxidase activity including the residue V155/157 of  
77 OGOX1/CELLOX (Benedetti et al., 2018; Locci et al., 2019) as the gatekeeper residue of the  
78 oxygen binding pocket [P(T/S)VGVGG] (Leferink et al., 2009; Zafred et al., 2015). Indeed,  
79 OGOXs and CELLOX inactivate the elicitor nature of OGs and CDs by concomitantly releasing  
80 H<sub>2</sub>O<sub>2</sub>, a molecule with multiple functions in the cell wall strengthening and signalling (Smirnoff  
81 and Arnaud, 2019). The oxidized oligosaccharides are characterized by an increased recalcitrance  
82 to enzymatic hydrolysis (Benedetti et al., 2018), but nothing is known about their involvement in  
83 other physiological processes. Recently, the combined use of Arabidopsis OGOX1 and a  
84 peroxidase (POD) allowed the measurement of the OGOX1 activity suggesting that possible  
85 physiological processes could be driven by the OGOX-generated H<sub>2</sub>O<sub>2</sub> in the presence of POD  
86 (Scortica et al., 2021). In the present study, the capability of generating H<sub>2</sub>O<sub>2</sub> by combinations of  
87 OGOX1 with a microbial polygalacturonase and CELLOX with a microbial endoglucanase was  
88 tested. The generated H<sub>2</sub>O<sub>2</sub> can be utilized as a substrate by POD for oxidative reactions possibly  
89 involved in defence and development (Fig. 1). Indeed, glycoside hydrolases (GHs), OGOX1,  
90 CELLOX and PODs perform their enzymatic function in the same cell compartment, i.e., the  
91 apoplast, and it is plausible to consider their activities as related in cell wall metabolism.

92 To evaluate whether, during a plant-microbe interaction, the combined activity of a plant-  
93 derived BBE-1 oxidase and a microbial GH generates H<sub>2</sub>O<sub>2</sub> that can be sequentially utilized by  
94 PODs to start biologically relevant reactions involved in defence and growth and therefore in the  
95 defence/growth trade-offs (Fig. 1), we used OGOX1 (Benedetti et al., 2018) and CELLOX (Locci  
96 et al., 2019) in combination with a recombinant endopolygalacturonase from *Fusarium*  
97 *phyllophilum* (FpPG) and a commercial endoglucanase from *Aspergillus niger* (AnEG),  
98 respectively. The commercial horseradish peroxidase VI-A type (HRP) that catalyzes the oxidative  
99 polymerization of guaiacol, here used as coniferyl alcohol analogue, and an anionic peroxidase  
100 preparation from ripe tomato fruit (APOD) that utilizes H<sub>2</sub>O<sub>2</sub> to oxidize IAA (Kokkinakis and

101 Brooks, 1979), a typical growth hormone, were used as representative plant PODs. FpPG, OGOX1  
102 and CELLOX were expressed in *P. pastoris* and purified to homogeneity. The expression of  
103 OGOX1, was achieved as reported in (Scortica et al., 2021), whereas the expression of CELLOX,  
104 due to the low yield and high protein instability, required a different expression strategy that  
105 consisted in the addition of a Flag-6xHis-SUMOstar tag upstream of the sequence encoding  
106 CELLOX (Fig. S1A). The sequence encoding the sumoylated form of CELLOX (Data S1), here  
107 referred to as FHS-CELLOX, was cloned under the control of the methanol-inducible promoter  
108 AOX and expressed in *P. pastoris*. Immuno-decoration analysis performed on the culture filtrates  
109 from four different transformants showed that FHS-CELLOX is expressed in a heavily  
110 glycosylated form (Fig. S1B) and, upon de-glycosylation with PNGase F, appears as a unique  
111 polypeptide chain of 74 kDa (Fig. S1C). OGOX1 was purified from the culture filtrate of *P.*  
112 *pastoris* by two hydrophobic interaction chromatography steps performed at two different pH  
113 values (5.0 and 7.0) (Scortica et al., 2021), whereas FHS-CELLOX was purified in a single step  
114 by IMAC chromatography. The AnEG used in our experiments was a highly pure preparation from  
115 a commercial source whereas FpPG was constitutively expressed in *P. pastoris* and purified using  
116 a three-step purification procedure as reported in (Benedetti et al., 2011). The protein yields were  
117 about 5 mg.L<sup>-1</sup>, 0.5 mg.L<sup>-1</sup> and 15 mg.L<sup>-1</sup> for OGOX1, FHS-CELLOX and FpPG, respectively.  
118 Before proceeding with the enzymatic assays, the purity grade of the different protein preparations  
119 was assessed by SDS-PAGE/Coomassie blue staining analysis (Fig. S2). To evaluate the H<sub>2</sub>O<sub>2</sub>-  
120 conversion efficiency of OGOX1 and FHS-CELLOX, the amount of H<sub>2</sub>O<sub>2</sub> released from the  
121 enzymatic oxidation of penta-galacturonic oligosaccharide and cello-triose, here used as model  
122 substrate of OGOX1 and FHS-CELLOX, respectively, was measured over reaction time. Our  
123 analysis clearly indicated that both OGOX1 and FHS-CELLOX are efficient reducing sugar-to-  
124 H<sub>2</sub>O<sub>2</sub> converters, with H<sub>2</sub>O<sub>2</sub> conversion efficiencies ranging from 85 to 95% (Fig. S3).  
125 Polygalacturonic acid and carboxy-methyl cellulose, respectively the substrates of FpPG and

126 AnEG, were added to the two enzyme combinations FpPG-OGO1-HRP and AnEG-(FHS-  
127 )CELLOX-HRP. In both reaction mixtures, HRP utilized the generated H<sub>2</sub>O<sub>2</sub>. As shown in Fig. 2,  
128 the degrading activity of FpPG and AnEG was quantitatively converted to tetra-guaiacol  
129 polymerization in a time-dependent manner, allowing to monitor the activity of both GHs over the  
130 entire reaction time. The absence of HRP or the BBE-1 oligosaccharide oxidase or the addition of  
131 CAT in the reaction mixture prevented the tetra-guaiacol polymerization (Fig. 2). Taken together,  
132 these results indicated the central role of H<sub>2</sub>O<sub>2</sub> as the molecule linking the activity of microbial  
133 GHs and plant PODs.

134 The ripe tomato fruit was used as source of APOD (Kokkinakis and Brooks, 1979). Before  
135 proceeding with the assays in combination with the OGO1/(FHS-)CELLOX pairs, APOD  
136 activity was quantified using ABTS and H<sub>2</sub>O<sub>2</sub> (Fig. S4). The same substrates, i.e., polygalacturonic  
137 acid and carboxy-methyl cellulose, were added to two enzyme combinations FpPG-OGO1-  
138 APOD and AnEG-(FHS-)CELLOX-APOD, respectively. In both reaction mixtures, APOD  
139 utilized the generated H<sub>2</sub>O<sub>2</sub>. As shown in Fig. 3A-B, the degrading activity of FpPG and AnEG  
140 was quantitatively converted to oxidized IAA in a time-dependent manner, and activities of both  
141 GHs could be monitored by following the amount of residual (non-oxidized) IAA over reaction  
142 time. Also in this case, the lack of APOD or a BBE-1 oligosaccharide oxidase prevented the IAA  
143 oxidation (Fig. 3A-B). These results taken together clearly demonstrate that the H<sub>2</sub>O<sub>2</sub> generated  
144 downstream of the GH/BBE-1 oligosaccharide oxidase pair is successfully used by plant PODs as  
145 oxidant in two different processes, i.e., tetra-guaiacol polymerization and IAA oxidation.

146 To date, OGO1-4 and CELLOX are the only plant BBE-1 proteins with proven oxidizing  
147 activities towards cell wall oligosaccharide fragments with elicitor nature, i.e., OGs and CDs.  
148 However, due to the large number of members constituting the different plant BBE-1 families  
149 (Daniel et al., 2017; Pontiggia et al., 2020), it is plausible that other BBE-1 enzymes still orphan  
150 of their substrate may act as specific oxidases of other cell wall-derived oligosaccharides. During

151 the reaction catalysed by OGOXs and CELLOX, OGs and CDs are inactivated and H<sub>2</sub>O<sub>2</sub> is formed.  
152 Unlike with other extracellular H<sub>2</sub>O<sub>2</sub>-producing enzymes such as the membrane bound NADPH  
153 oxidase (Kadota et al., 2015), H<sub>2</sub>O<sub>2</sub> produced by OGOXs and CELLOX is produced only locally  
154 from the reducing end of OGs and CDs enzymatically liberated, either by an endogenous enzyme  
155 or, as in the case of a pathogenic attack, by microbial GHs at the site of infection where one  
156 molecule of H<sub>2</sub>O<sub>2</sub> is generated from one free reducing end. During the degradation of the plant cell  
157 wall, the resulting OGs and CDs and possibly other cell wall fragments can be converted by OGOX  
158 and CELLOX and possibly other BBE-1 oligosaccharide oxidases to H<sub>2</sub>O<sub>2</sub> that, in turn, may be  
159 used by extracellular PODs to promptly reinforce the cell wall in a proportional opposite direction  
160 to the occurring degradation, i.e., more degradation is performed by microbes, more lignification  
161 occurs (Fig. 4). During the pathogen attack, the same enzymatic interplay may also cause inhibition  
162 of plant growth through an oxidation of the extracellular IAA (Fig. 4). The APOD-mediated  
163 oxidation of IAA could play a role in the growth-defence trade-off when plants are required to  
164 redirect their metabolic energy from primary to secondary metabolism during pathogen infection  
165 (Pontiggia et al., 2020). Thus, the type of molecule that will be oxidized by H<sub>2</sub>O<sub>2</sub> will depend on  
166 the substrate specificity of the available plant POD. Considering that 73 different class III plant  
167 PODs exist in *A. thaliana* (Almagro et al., 2009) and that most of them are localized in the  
168 extracellular space, the oxidizing activity of H<sub>2</sub>O<sub>2</sub> can be sorted towards several metabolic  
169 pathways. Indeed, Arabidopsis BBE-1 oligosaccharide oxidases (OGOX1 and CELLOX) and  
170 several class III PODs are positively co-expressed during fungal infection, corroborating their  
171 involvement in a potential enzymatic interplay in plant defence (Fig. S5, Table S1). Our  
172 experiments clearly demonstrate that apparently unrelated enzymes such as glycoside hydrolases,  
173 the flavoenzymes OGOX1 and CELLOX and metallo-oxidoreductases (POD) can work together  
174 under the same apoplastic conditions (pH 5.5) and transduce the cell wall hydrolysis performed by  
175 microbial GHs into biochemical reactions involved both in defence and growth. This aspect may



176 allow the plants to mount a balanced response by lowering the metabolic costs and deleterious  
177 effects deriving from an exaggerated activation of their immunity (Benedetti et al., 2015). It is also  
178 worth mentioning that H<sub>2</sub>O<sub>2</sub> is *per se* an important transduction signal and the recent identification  
179 of the extracellular H<sub>2</sub>O<sub>2</sub> sensor HPCA1 from *A. thaliana* reinforces its role as a cell-to-cell signal  
180 in plant immunity. Here, H<sub>2</sub>O<sub>2</sub>-mediated modification of the cysteine residues localized in HPCA1  
181 ectodomain leads to stomatal closure, a well know defence response against pathogenic bacteria  
182 (Wu et al., 2020).

183 Interestingly, oligosaccharide oxidases are also produced by phytopathogens and saprotrophs. In  
184 this case, H<sub>2</sub>O<sub>2</sub> produced from their activity may be used by microbial lytic polysaccharide  
185 monooxygenases (LPMOs) to degrade cellulose, xylan and pectin (Villares et al., 2017; Couturier  
186 et al., 2018; Sabbadin et al., 2021) since the copper-containing active site of LPMOs can be  
187 reactivated through a H<sub>2</sub>O<sub>2</sub>-mediated reduction (Müller et al., 2018).

188 In conclusion, our study provides a novel perspective on how the cell wall hydrolysis can  
189 be perceived and managed by plants to balance growth and defence (Fig. 4). The high number of  
190 PODs in plants and the possible occurrence of many other BBE-I oligosaccharide oxidases in  
191 addition to OGOX1 and CELLOX poses major challenges in elucidating their role not only in  
192 plant-microbe interactions but also in plant development, morphogenesis and growth.

193

#### 194 **AUTHOR CONTRIBUTIONS**

195 M.B. and B.M. conceived the project. M.B. designed the experiments, A.S. performed the  
196 experiments and analyzed the data jointly with F.A., F.C., G.D.L., M.B. and B.M; V.S. and M.G.  
197 contributed to perform the experiments. A.S., M.G. and M.B. wrote the manuscript draft whereas  
198 F.A., F.C., G.D.L., M.B. and B.M. edited the final version of the manuscript. B.M. and M.B.  
199 supervised the research. All authors have approved the final manuscript.

200



201 **ACKNOWLEDGEMENTS**

202 The authors gratefully acknowledge Prof. Giuseppina Pitari (Dept. of Life, Health and  
203 Environmental Sciences, University of L'Aquila) for inspiring discussions on flavoenzymes.

204

205 **FUNDING**

206 This work was supported by the Italian Ministry of University and Research (MIUR) under grant  
207 PON for industrial research and experimental development ARS01\_00881 and under grant PRIN  
208 2017ZBBYNC, both funded to Prof. Benedetta Mattei.

209

210 **CONFLICTS OF INTEREST**

211 The authors declare no conflict of interest.

212

213

214

215

216

217

218

219

220

221

222

223

224

225

226

## 227 REFERENCES

- 228 Almagro, L., Gómez Ros, L.V., Belchi-Navarro, S., Bru, R., Ros Barceló, A., and Pedreño, M.A. 2009.  
229 Class III peroxidases in plant defence reactions. *Journal of experimental botany* 60.
- 230 Benedetti, M., Locci, F., Gramegna, G., Sestili, F., and Savatin, D. 2019. Green Production and  
231 Biotechnological Applications of Cell Wall Lytic Enzymes. *Applied Sciences* 9:5012.
- 232 Benedetti, M., Leggio, C., Federici, L., De Lorenzo, G., Pavel, N., and Cervone, F. 2011. Structural  
233 resolution of the complex between a fungal polygalacturonase and a plant polygalacturonase-  
234 inhibiting protein by small-angle X-ray scattering. *Plant physiology* 157.
- 235 Benedetti, M., Verrascina, I., Pontiggia, D., Locci, F., Mattei, B., De Lorenzo, G., and Cervone, F. 2018.  
236 Four Arabidopsis berberine bridge enzyme-like proteins are specific oxidases that inactivate the  
237 elicitor-active oligogalacturonides. *The Plant journal : for cell and molecular biology* 94.
- 238 Benedetti, M., Pontiggia, D., Raggi, S., Cheng, Z., Scaloni, F., Ferrari, S., Ausubel, F.M., Cervone, F., and  
239 De Lorenzo, G. 2015. Plant immunity triggered by engineered in vivo release of  
240 oligogalacturonides, damage-associated molecular patterns. *Proc. Natl. Acad. Sci. U. S. A.*  
241 112:5533-5538.
- 242 Couturier, M., Ladevèze, S., Sulzenbacher, G., Ciano, L., Fanuel, M., Moreau, C., Villares, A., Cathala, B.,  
243 Chaspoul, F., Frandsen, K.E., Labourel, A., Herpoël-Gimbert, I., Grisel, S., Haon, M., Lenfant, N.,  
244 Rogniaux, H., Ropartz, D., Davies, G.J., Rosso, M.-N., Walton, P.H., Henrissat, B., and Berrin, J.-  
245 G. 2018. Lytic xylan oxidases from wood-decay fungi unlock biomass degradation. *Nature*  
246 *Chemical Biology* 14:306-310.
- 247 Daniel, B., Konrad, B., Toplak, M., Lahham, M., Messenlehner, J., Winkler, A., and Macheroux, P. 2017.  
248 The family of berberine bridge enzyme-like enzymes: A treasure-trove of oxidative reactions. *Arch.*  
249 *Biochem. Biophys.* 632:88-103.
- 250 Daniel, B., Wallner, S., Steiner, B., Oberdorfer, G., Kumar, P., van der Graaff, E., Roitsch, T., Sensen,  
251 C.W., Gruber, K., and Macheroux, P. 2016. Structure of a berberine bridge enzyme-like enzyme  
252 with an active site specific to the plant family brassicaceae. *PLOS ONE* 11:e0156892.
- 253 Daniel, B., Pavkov-Keller, T., Steiner, B., Dordic, A., Gutmann, A., Nidetzky, B., Sensen, C.W., van der  
254 Graaff, E., Wallner, S., Gruber, K., and Macheroux, P. 2015. Oxidation of monolignols by members  
255 of the berberine-bridge enzyme family suggests a role in plant cell wall metabolism. *Journal of*  
256 *Biological Chemistry* 290:18770-18781.
- 257 Giovannoni, M., Gramegna, G., Benedetti, M., and Mattei, B. 2020. Industrial Use of Cell Wall Degrading  
258 Enzymes: The Fine Line Between Production Strategy and Economic Feasibility. *Frontiers in*  
259 *bioengineering and biotechnology* 8.
- 260 Kadota, Y., Shirasu, K., and Zipfel, C. 2015. Regulation of the NADPH oxidase RBOHD during plant  
261 immunity. *Plant Cell Physiol* 56:1472-1480.
- 262 Kokkinakis, D.M., and Brooks, J.L. 1979. Hydrogen Peroxide-mediated Oxidation of Indole-3-acetic Acid  
263 by Tomato Peroxidase and Molecular Oxygen. *Plant Physiol.* 64:220-223.
- 264 Leferink, N.G., Fraaije, M.W., Joosten, H.J., Schaap, P.J., Mattevi, A., and van Berkel, W.J. 2009.  
265 Identification of a gatekeeper residue that prevents dehydrogenases from acting as oxidases. *J Biol*  
266 *Chem* 284:4392-4397.
- 267 Locci, F., Benedetti, M., Pontiggia, D., Citterico, M., Caprari, C., Mattei, B., Cervone, F., and De Lorenzo,  
268 G. 2019. An Arabidopsis berberine bridge enzyme-like protein specifically oxidizes cellulose  
269 oligomers and plays a role in immunity. *Plant J* 98:540-554.

- 270 Müller, G., Chylenski, P., Bissaro, B., Eijnsink, V., and Horn, S. 2018. The impact of hydrogen peroxide  
271 supply on LPMO activity and overall saccharification efficiency of a commercial cellulase cocktail.  
272 *Biotechnology for biofuels* 11.
- 273 Pontiggia, D., Benedetti, M., Costantini, S., De Lorenzo, G., and Cervone, F. 2020. Dampening the  
274 DAMPs: how plants maintain the homeostasis of cell wall molecular patterns and avoid hyper-  
275 immunity. *Front Plant Sci* 11:613259.
- 276 Sabbadin, F., Urresti, S., Henrissat, B., Avrova, A., Welsh, L., Lindley, P., Csukai, M., Squires, J., Walton,  
277 P., Davies, G., Bruce, N., Whisson, S., and McQueen-Mason, S. 2021. Secreted pectin  
278 monooxygenases drive plant infection by pathogenic oomycetes. *Science (New York, N.Y.)* 373.
- 279 Scortica, A., Capone, M., Narzi, D., Frezzini, M., Scafati, V., Giovannoni, M., Angelucci, F., Guidoni, L.,  
280 Mattei, B., and Benedetti, M. 2021. A molecular dynamics-guided mutagenesis identifies two  
281 aspartic acid residues involved in the pH-dependent activity of OG-OXIDASE 1. *Plant Physiology*  
282 and *Biochemistry* 169:171-182.
- 283 Smirnov, N., and Arnaud, D. 2019. Hydrogen peroxide metabolism and functions in plants. *New*  
284 *Phytologist* 221:1197-1214.
- 285 Villares, A., Moreau, C., Bennati-Granier, C., Garajova, S., Foucat, L., Falourd, X., Saake, B., Berrin, J.-  
286 G., and Cathala, B. 2017. Lytic polysaccharide monooxygenases disrupt the cellulose fibers  
287 structure. *Scientific Reports* 7:40262.
- 288 Wu, F., Chi, Y., Jiang, Z., Xu, Y., Xie, L., Huang, F., Wan, D., Ni, J., Yuan, F., Wu, X., Zhang, Y., Wang,  
289 L., Ye, R., Byeon, B., Wang, W., Zhang, S., Sima, M., Chen, S., Zhu, M., Pei, J., Johnson, D., Zhu,  
290 S., Cao, X., Pei, C., Zai, Z., Liu, Y., Liu, T., Swift, G., Zhang, W., Yu, M., Hu, Z., Siedow, J.,  
291 Chen, X., and Pei, Z. 2020. Hydrogen peroxide sensor HPCA1 is an LRR receptor kinase in  
292 *Arabidopsis*. *Nature* 578.
- 293 Zafred, D., Steiner, B., Teufelberger, A.R., Hromic, A., Karplus, P.A., Schofield, C.J., Wallner, S., and  
294 Macheroux, P. 2015. Rationally engineered flavin-dependent oxidase reveals steric control of  
295 dioxygen reduction. *FEBS J* 282:3060-3074.
- 296
- 297
- 298
- 299
- 300
- 301
- 302
- 303
- 304
- 305
- 306

307 MAIN FIGURES

308

309

310

311

312

313

314

315

316

317

318

319 **Fig. 1. OGOX1 and CELLOX as transducers between microbial GHs and plant PODs.** (A)  
 320 Schematic representation showing the transducing role of OGOX1 and CELLOX between  
 321 microbial GHs and plant PODs and their potential involvement in different plant processes. (B)  
 322 Working model of a OGOX1/CELLOX-POD machinery: in step 1, microbial GHs hydrolyse the  
 323 cell wall polysaccharides by generating reducing end-free oligomers. In step 2, specific BBE-l  
 324 oligosaccharide oxidases (OGOX1 and CELLOX) oxidize such reducing ends by concomitantly  
 325 releasing  $H_2O_2$ . In step 3,  $H_2O_2$  is used by plant PODs to oxidize monolignols or IAA. [BBE-l:  
 326 Berberine bridge enzyme-like, CELLOX: CD-oxidase from *A. thaliana*, GH: Glycoside hydrolase,  
 327 OGOX1: OG-oxidase 1 from *A. thaliana*, POD: Peroxidase, IAA: indole-3-acetic acid, oxIAA:  
 328 oxidized indole-3-acetic acid].

329

330

331

332

333

334

335

336

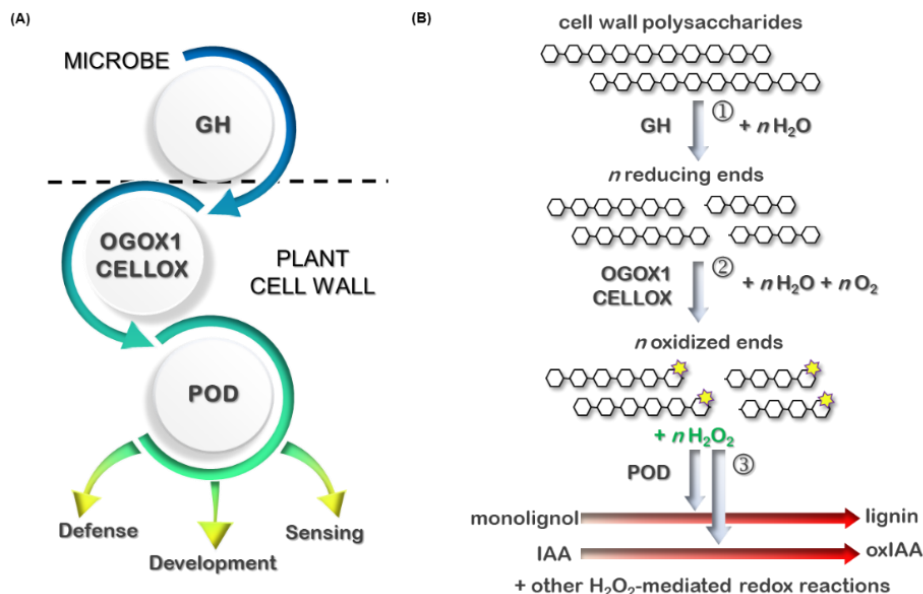

337  
338  
339  
340  
341  
342  
343  
344  
345  
346  
347  
348  
349  
350  
351  
352  
353  
354  
355  
356  
357  
358  
359  
360  
361  
362  
363  
364  
365  
366  
367  
368

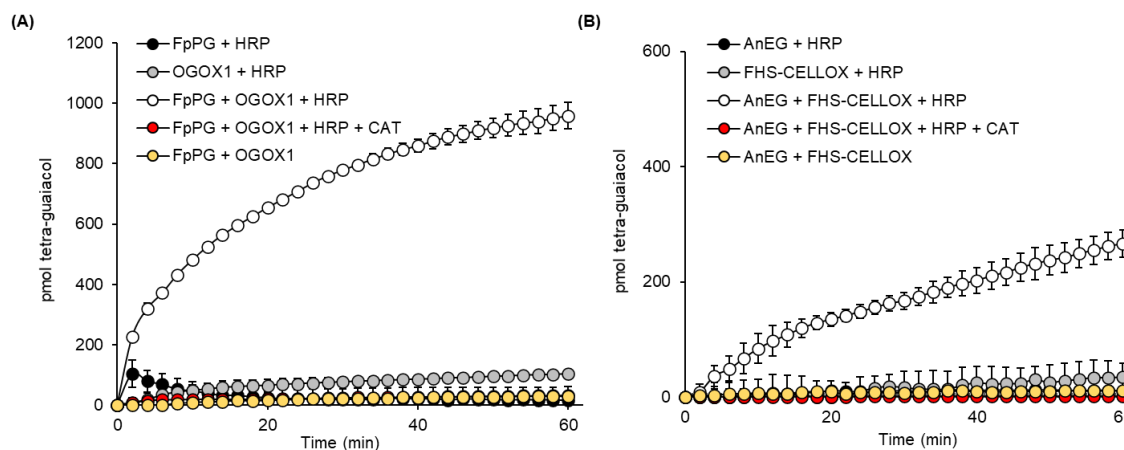

**Fig. 2. A OGOX1/CELLOX-POD machinery quantitatively converts a polysaccharide hydrolysis to tetra-guaiacol polymerization.** (A, B) Tetra-guaiacol polymerization over time using a OGOX1/CELLOX-POD machinery formed by (A) FpPG, OGOX1 and HRP against polygalacturonic acid and (B) AnEG, FHS-CELLOX and HRP against carboxy-methyl cellulose. For each enzymatic machinery, different combinations of enzymes were used. As control, CAT was added to eliminate the H<sub>2</sub>O<sub>2</sub> generated by each GH-OGOX1/CELLOX pair. Values are mean ± s.d. (n= 2). The experiments (A, B) were repeated twice with similar results. [AnEG: endoglucanase from *A. niger*, CAT: catalase from bovine liver, FHS-CELLOX: Flag-His-SUMOstar-tagged CD-oxidase from *A. thaliana*, FpPG: endopolygalacturonase from *F. phyllophilum*, OGOX1: His-tagged OG-oxidase 1 from *A. thaliana*, HRP: horseradish peroxidase VI-A type].

369  
370  
371  
372  
373  
374  
375  
376  
377  
378  
379  
380  
381  
382  
383  
384  
385  
386  
387  
388  
389  
390  
391  
392  
393  
394  
395  
396  
397  
398  
399  
400  
401  
402  
403

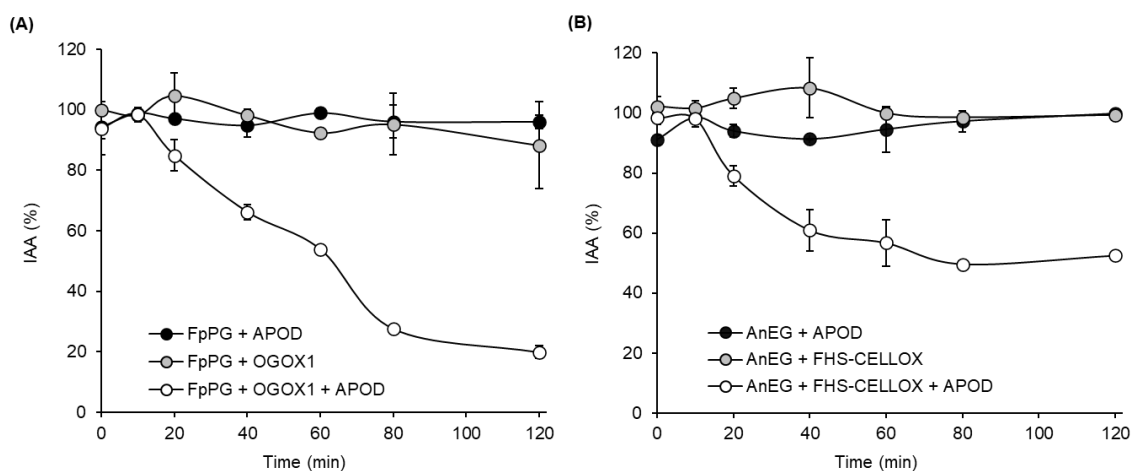

**Fig. 3. A OGOX1/CELLOX-POD machinery quantitatively converts a polysaccharide hydrolysis to IAA oxidation.** (A, B) IAA oxidation over time using a OGOX1/CELLOX-POD machinery formed by (A) FpPG, OGOX1 and APOD against polygalacturonic acid and (B) AnEG, FHS-CELLOX and APOD against carboxy-methyl cellulose. For each enzymatic machinery, different combinations of enzymes were used. Values are mean  $\pm$  s.d. (n= 2). The experiments (A, B) were repeated twice with similar results. [AnEG: endoglucanase from *A. niger*, APOD: anionic peroxidase preparation from ripe tomato fruit, FHS-CELLOX: Flag-His-SUMOstar-tagged CD-oxidase from *A. thaliana*, FpPG: endopolygalacturonase from *F. phyllophilum*, OGOX1: His-tagged OG-oxidase 1 from *A. thaliana*].

404

405

406

407

408

409

410

411

412

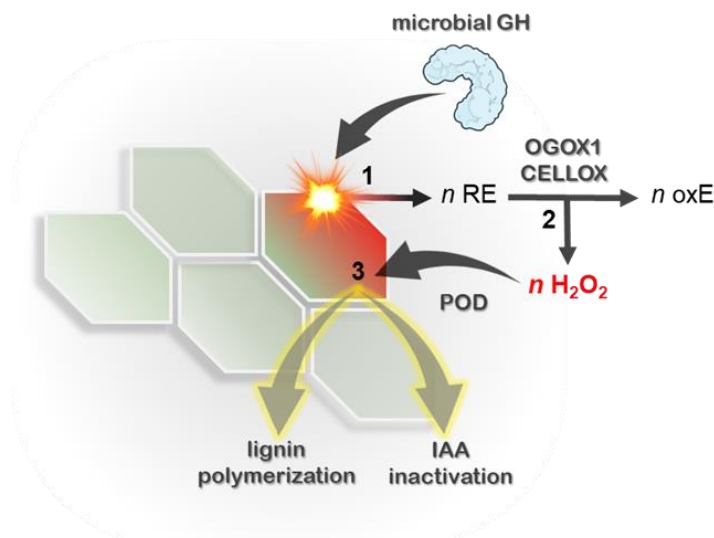

413 **Fig. 4. Proposed model of OGOX1/CELLOX as transducers between microbial GHs and**  
414 **plant PODs.** The combined action of a microbial GH, a specific berberine bridge enzyme-like  
415 oligosaccharide oxidase (OGOX1, CELLOX) and a plant POD succeeded in converting the  
416 hydrolysis of a cell wall polysaccharide to lignin polymerization and auxin inactivation over  
417 degradation time. Black numbers (1-3) indicate the sequential order of the enzymatic reactions.  
418 [CELLOX: CD-oxidase from *A. thaliana*, GH: Glycoside hydrolase, IAA: indole-3-acetic acid,  
419 OGOX1: OG-oxidase 1 from *A. thaliana*, oxE: oxidized end, POD: Peroxidase, RE: reducing end].

420



## SUPPLEMENTARY INFORMATION

bioRxiv preprint doi: <https://doi.org/10.1101/2022.04.15.488465>; this version posted April 15, 2022. The copyright holder for this preprint (which was not certified by peer review) is the author/funder, who has granted bioRxiv a license to display the preprint in perpetuity. It is made available under aCC-BY-NC-ND 4.0 International license.

### BERBERINE BRIDGE ENZYME-LIKE OLIGOSACCHARIDE OXIDASES ACT AS ENZYMATIC TRANSDUCERS BETWEEN MICROBIAL GLYCOSIDE HYDROLASES AND PLANT PEROXIDASES

Anna Scortica<sup>a</sup>, Moira Giovannoni<sup>a</sup>, Valentina Scafati<sup>a</sup>, Francesco Angelucci<sup>a</sup>, Felice Cervone<sup>b</sup>, Giulia De Lorenzo<sup>b</sup>, Manuel Benedetti<sup>a,\*</sup>, Benedetta Mattei<sup>a</sup>

<sup>a</sup>Department of Life, Health and Environmental Sciences, University of L'Aquila, 67100 L'Aquila, Italy.

<sup>b</sup>Department of Biology and Biotechnology "Charles Darwin", Sapienza University of Rome, 00185 Rome, Italy.

\*corresponding author: [manuel.benedetti@univaq.it](mailto:manuel.benedetti@univaq.it), Department of Life, Health and Environmental Sciences, University of L'Aquila, 67100 L'Aquila, Italy; phone +39 0862433272.

**Methods S1.** Experimental material and methods.

**Data S1.** Gene sequence used for the heterologous expression of Flag-His-SUMOstar-CELLOX (FHS-CELLOX) in *P. pastoris*.

**Table S1.** ATG code of 73 different class III PODs from *A. thaliana*.

**Fig. S1.** Heterologous expression of FHS-CELLOX in *P. pastoris*.

**Fig. S2.** Purification of the enzymes heterologously expressed in *P. pastoris*.

**Fig. S3.** H<sub>2</sub>O<sub>2</sub>-conversion efficiency of OGOX1 and FHS-CELLOX.

**Fig. S4.** Determination of ABTS-oxidizing activity of APOD from ripe tomato fruit.

**Fig. S5.** Heatmap of gene expression levels of OGOX1, CELLOX and different class III PODs from *A. thaliana*.

## Methods S1

### Design of the constructs expressing OGOX1, CELLOX and FpPG

The constructs expressing Arabidopsis OGOX1 (pPICZαB/H-OGOX1) and the polygalacturonase from *Fusarium phyllophilum* (FpPG, pGAPZαA/FpPG) were the same used in (Benedetti et al., 2011; Scortica et al., 2021), respectively. The gene encoding the mature CELLOX from *A. thaliana* (AT4G20860) was fused downstream of the SUMOstar sequence developed by LifeSensor Inc. (<https://lifesensors.com/>) that also included the sequences encoding the FLAG- (DYKDDDDK) and

codon-optimized with the codon usage of *P. pastoris* by using the online tool OPTIMIZER (<http://genomes.urv.es/OPTIMIZER/>) (Puigbò et al., 2007) and synthesized by Genescript (<https://www.genscript.com/>) by adding the restriction sites PstI and XbaI at the 5<sup>l</sup> and 3<sup>l</sup> ends, respectively, of the gene. The gene *FHS-CELLOX* was then cloned in pPICZαB expression vector (Invitrogen, San Diego, USA) in frame with the sequence encoding the yeast α factor for the secretion of recombinant proteins in the medium.

### **Heterologous expression of OGOX1, FHS-CELLOX and FpPG in *Pichia pastoris***

OGOX1 and FpPG were heterologously expressed in *P. pastoris* by following the same procedures described in (Benedetti et al., 2011; Scortica et al., 2021), respectively. Transformation and selection of *Pichia* transformants expressing FHS-CELLOX were performed by following the same procedures described in (Scortica et al., 2021) with some modifications. In particular, to further improve the detection of FHS-CELLOX, the culture filtrates from different *Pichia* transformants were pretreated with PNGase F (New England Biolabs, Ipswich, USA) and then analyzed by immuno-decoration analysis by using a monoclonal anti-HIS antibody (AbHis, Bio-rad, Hercules, USA). The immobilized metal affinity chromatography (IMAC) was used to bind FHS-CELLOX whereas the elution was performed by using a linear gradient of imidazole. The eluted protein was dialyzed in 50 mM Tris-HCl pH 7.5 and 100 mM (NH<sub>4</sub>)<sub>2</sub>SO<sub>4</sub> by using a Vivaspin 30,000 MWCO PES (Sartorius, Gottinga, Germany).

### **Evaluation of H<sub>2</sub>O<sub>2</sub>-conversion efficiency of OGOX1 and FHS-CELLOX**

The H<sub>2</sub>O<sub>2</sub>-conversion efficiency of OGOX1 and FHS-CELLOX was determined by the orange-xylene assay (Benedetti et al., 2018) using 15 μM penta-galacturonic oligosaccharide (Elicityl SA, Crolles, France) or 15 μM cello-triose (Sigma-Aldrich, Saint Louis, USA), respectively, and 100 ng of each purified enzyme in a reaction volume of 0.1 mL. Values of H<sub>2</sub>O<sub>2</sub>-conversion efficiency (%)

expressed the percentage ratio of  $\mu\text{moles}$  of  $\text{H}_2\text{O}_2$  released from  $\mu\text{moles}$  of substrate reducing ends  
bioRxiv preprint doi: <https://doi.org/10.1101/2022.04.15.488465>; this version posted April 15, 2022. The copyright holder for this preprint (which  
was not certified by peer review) is the author/funder, who has granted bioRxiv a license to display the preprint in perpetuity. It is made  
available under aCC-BY-NC-ND 4.0 International license.

over reaction time. Determination of reducing ends of each substrate was performed according to (Lever, 1972) using different amounts of glucose as calibration curve. All the enzymatic assays were performed in 20 mM Na acetate pH 5.5 and 50 mM NaCl at 25 °C.

### **Bulk extraction of anionic tomato peroxidases (APOD) and evaluation of the activity by the ABTS-POD coupled assay**

The extraction of anionic tomato peroxidases (APOD) was performed according to (Andrews et al., 2002) with some modifications. In brief, 10 gr of fresh ripe tomato fruit were frozen in liquid nitrogen and homogenized in a MM500 VARIO Mixer Mill (Retsch, Basel, Switzerland) by using a 25 mL screw-top grinding jars containing one grinding ball (15 mm) for 3-5 min at 30 Hz. The homogenized tissue was resuspended in 20 mL of a buffer composed of 50 mM Na acetate pH 5.0 and 0.5 M NaCl and incubated at 4°C under gentle shaking for 1 hour. The suspension was centrifuged at 2800 x g for 20 min and the supernatant filtered using a PES Syringe filter (0.2  $\mu\text{m}$ ). The filtrate was dialyzed and concentrated (16X) using a Vivaspin 10,000 MWCO PES (Sartorius, Gottinga, Germany) and quantified by the Bradford reagent (Bio-rad, Hercules, USA). The sample prepared according to this procedure was referred to as APOD. The sample was tested for the capability of oxidizing ABTS in the presence of 50  $\mu\text{M}$   $\text{H}_2\text{O}_2$  (ABTS-POD coupled assay) using a reaction buffer composed of 100  $\mu\text{M}$  ABTS 2,2'-azino-bis-(3-ethylbenzothiazoline-6-sulfonic acid) (Sigma-Aldrich, Saint Louis, USA) and 0.14  $\text{g}\cdot\text{L}^{-1}$  APOD (5% v/v, 100  $\mu\text{L}$  total volume). Enzyme activity was spectrophotometrically determined at 25°C by using an Infinite® M Nano200 spectrophotometer (Tecan AG, Männedorf, Switzerland). The oxidation of ABTS to the cationic radical  $\text{ABTS}^{+\bullet}$  was measured in continuum mode for 25 min at 415 nm ( $\epsilon_{415\text{nm}} = 34 \text{ mM}^{-1} \text{ cm}^{-1}$ ).

### **Tetra-guaiacol polymerization**

The oxidative polymerization of guaiacol to tetra-guaiacol was measured by following the increase in absorbance at 470 nm ( $\epsilon_{470\text{nm}} = 26.6 \text{ mM}^{-1} \text{ cm}^{-1}$ ) (Koduri and Tien, 1995). The OGOX1/(FHS-

bioRxiv preprint doi: <https://doi.org/10.1101/2022.04.15.488465>; this version posted April 15, 2022. The copyright holder for this preprint (which was not certified by peer review) is the author/funder, who has granted bioRxiv a license to display the preprint in perpetuity. It is made available under aCC-BY-NC-ND 4.0 International license.

)CELLOX-HRP assay was performed in 20 mM Na acetate pH 5.5 containing 0.5% (w/v) polygalacturonic acid (Sigma-Aldrich, Saint Louis, USA) or 0.5% (w/v) carboxy-methyl cellulose (P-CMC4M; Megazyme, Dublin, Ireland), 150  $\mu$ M guaiacol [2-methoxyphenol, (Sigma-Aldrich, Saint Louis, USA)] and 0.05  $\text{g.L}^{-1}$  horseradish peroxidase VI-A type (HRP) (Sigma-Aldrich, Saint Louis, USA) in a reaction volume of 0.2 mL. The mixture also included a GH enzyme [7  $\text{mg.L}^{-1}$  FpPG or 0.2  $\text{mg.L}^{-1}$  endoglucanase from *Aspergillus niger* (AnEG) (E-CELAN; Megazyme, Dublin, Ireland)] and the appropriate BBE-1 oligosaccharide oxidase (3  $\text{mg.L}^{-1}$  OGOX1 or 3  $\text{mg.L}^{-1}$  FHS-CELLOX). To assess the involvement of  $\text{H}_2\text{O}_2$  in the oxidative polymerization of guaiacol, a catalase (CAT) from bovine liver (Sigma-Aldrich, Saint Louis, USA) was added to the reaction (0.02  $\text{g.L}^{-1}$ ). The activity of the OGOX1/(FHS-)CELLOX-HRP machinery was spectrophotometrically measured at 25°C by using an Infinite® M Nano200 spectrophotometer (Tecan AG, Männedorf, Switzerland) in continuum mode for 60 min.

### **IAA oxidation**

IAA oxidation was measured using the modified Salkowski method described in (Gang et al., 2019). The OGOX1/(FHS-)CELLOX-APOD assay was performed in 20 mM Na acetate pH 5.5 containing 0.5% (w/v) polygalacturonic acid (Sigma-Aldrich, Saint Louis, USA) or 0.5% (w/v) carboxy-methyl cellulose (P-CMC4M; Megazyme, Dublin, Ireland), 500  $\mu$ M IAA [indole-3-acetic acid, auxin (Sigma-Aldrich, Saint Louis, USA)] and 0.14  $\text{g.L}^{-1}$  APOD in a reaction volume of 0.1 mL. The mixture also included a GH enzyme (7  $\text{mg.L}^{-1}$  FpPG or 0.2  $\text{mg.L}^{-1}$  AnEG) and the appropriate BBE-1 oligosaccharide oxidase (3  $\text{mg.L}^{-1}$  OGOX1 or 3  $\text{mg.L}^{-1}$  FHS-CELLOX). IAA oxidation was measured at 25°C by following the decrease in absorbance at 536 nm using an Infinite® M Nano200 spectrophotometer (Tecan AG, Männedorf, Switzerland). Each absorption value was converted in  $\mu$ M IAA by interpolation with the IAA-calibration curve and then converted to percentage of residual IAA (% IAA) respect to the starting concentration (i.e., 500  $\mu$ M corresponds to 100% IAA).

## REFERENCES

- Andrews, J., Adams, S., Burton, K., and Edmondson, R. 2002. Partial purification of tomato fruit peroxidase and its effect on the mechanical properties of tomato fruit skin. *Journal of experimental botany* 53.
- Benedetti, M., Leggio, C., Federici, L., De Lorenzo, G., Pavel, N., and Cervone, F. 2011. Structural resolution of the complex between a fungal polygalacturonase and a plant polygalacturonase-inhibiting protein by small-angle X-ray scattering. *Plant physiology* 157.
- Benedetti, M., Verrascina, I., Pontiggia, D., Locci, F., Mattei, B., De Lorenzo, G., and Cervone, F. 2018. Four *Arabidopsis* berberine bridge enzyme-like proteins are specific oxidases that inactivate the elicitor-active oligogalacturonides. *The Plant journal : for cell and molecular biology* 94.
- Gang, S., Sharma, S., Saraf, M., Buck, M., and Schumacher, J. 2019. Analysis of Indole-3-acetic Acid (IAA) Production in *Klebsiella* by LC-MS/MS and the Salkowski Method. *Bio-protocol* 9.
- Koduri, R., and Tien, M. 1995. Oxidation of guaiacol by lignin peroxidase. Role of veratryl alcohol. *The Journal of biological chemistry* 270.
- Lever, M. 1972. A new reaction for colorimetric determination of carbohydrates. *Analytical Biochemistry* 47:273-279.
- Puigbò, P., Guzmán, E., Romeu, A., and Garcia-Vallvé, S. 2007. OPTIMIZER: a web server for optimizing the codon usage of DNA sequences. *Nucleic acids research* 35.
- Scortica, A., Capone, M., Narzi, D., Frezzini, M., Scafati, V., Giovannoni, M., Angelucci, F., Guidoni, L., Mattei, B., and Benedetti, M. 2021. A molecular dynamics-guided mutagenesis identifies two aspartic acid residues involved in the pH-dependent activity of OG-OXIDASE 1. *Plant Physiology and Biochemistry* 169:171-182.

### Data S1. Gene sequence used for the heterologous expression of Flag-His-SUMOstar-CELLOX

(FHS-CELLOX) in *P. pastoris*. Codon-optimized sequence of FHS-CELLOX used for the expression in *Pichia pastoris*. The sequence was fused downstream of the sequence encoding the  $\alpha$ -factor signal peptide from the vector pPICZaB. Underlined sequences: restriction sites used for cloning (i.e., PstI and XbaI); turquoise sequence: Flag epitope-encoding sequence; green sequence: 6xHis tag-encoding sequence; purple sequence: codon-optimized sequence encoding the SUMOstar tag; grey sequence: codon-optimized sequence encoding the mature CELLOX; red sequence: STOP codon.

CTGCAGGTGATTACAAGGATGATGATGATAAGGGTCA<sup>T</sup>CCACCATCATCATCAC<sup>G</sup>GGTGGTTCTGATTCTGAAGTTAACCAAGAAGCTAAGCCAGAAGTTAAGCCAGAAGTTAAGCCAGAACTCATATAACTTGAAGGTTTCTGATGGTCTTCTGAAATTTTTTTAAGATTAGAAGACTACTCCATTGAAGATTGATGGAAGCTTTTGCTAAGAGACAAGGTAAGGAAATGGATTCTTTGACTTTTTTGATCGATGGTATTGAAATCAAGCTGATCAAACCTCCAGAAGATTTGGATATGGAAGATAACGATATTGGAAGCTCATAGAGAACAATTGGTGGTACTCCA<sup>A</sup>ACTAGAGAACAATTTCAAAACTGTTTGTCTACTAAGCAATTTAACTCTACTTTGAAGAACCCAATTA<sup>A</sup>CTTGACTACTCATACTTTGGATTCCAGAGTTCATACTGATTTTTCTGAATCTTCTTCTCCAAACTCTTCTTTTTTGA<sup>A</sup>CTTGA<sup>A</sup>CTTTACTTCTTTGAAGCCAATTTTGATTGTTAAGCCAAAGTCTGAATCTGAAATTAAGCAATCTATTTGTGTTCCAGAAAGTTGGGTGTTCAAGTTAGA<sup>A</sup>CTATGTCTGGTGGTCATGATTACGAAGGTTTGTCTTACTTGTCTTTGTCTCCATTTATTATTGTTGATTTGGTTAACTTGAGATCTATTTCTATTA<sup>A</sup>CTTGACTGATGAAACTGCTTGGATTCAATCTGGT<sup>G</sup>CTACTTTGGGTGAAGTTTACTACAAGATTGCTAAGACTTCTAAGATTCATGCTTTTGCTGCTGGTATTTGTCCATCTGTTGGTGTGGTGGTCATATTTCTGGTGGTGGTTTTGGTACTATTATGAGAAAGTACGGTTTTGGCTTCTGATAACGTTGTTGATGCTAGATTGATGGATGTTAACGGTAAGACTTTGGATAGAAAGACTATGGGTGAAGATTTGTTTTGGGCTTTTGAGAGGTGGTGGTGGTGGTCTTCTTTTGGTGTGTTTTGTCTTGGAAGGTTAAGTTGGCTAGAGTTCCAGAAAAGGTTACTTGT<sup>T</sup>TTATTTCTCAACATCCAATGGGTCCATCTATGAACAAGTTGGTTCATAGATGGCAATCTATTGGTCTGAATTGGATGAAGATTTGTTTATTAGAGTTATTATTGATAACTCTTTGGAAGGTAACCAAAGAAAGGTTAAGTCTACTTTCAA<sup>A</sup>ACTTTGTTTTGGGTGGTATTGATAGATTGATTCCATTGATGAACCAAAGTTTCCAGAATTGGGTTTGAGATCTCAAGATTGTTCTGAAATGTCTTGGATTGAATCTATTATGTTTTTAACTGGAGATCTGGTCAACCATTGGA<sup>A</sup>AATTTGTTGAACAGAGATTTGAGATTTGAAGATCAATACTTTAAGGCTAAGTCTGATTACGTTCAAAGCCAGTTCAGAAAACGTTTTTGAAGAAGTTACTAAGAGATTTTTGGAACAAGATACTCCATTGATGATTTTTGAACCATTGGGTGGTAAGATTTCTAAGATTTCTGAAACTGAATCTCCATACCCACATAGAAGAGGTAACCTGTACAACATTC<sup>A</sup>AATACATGGTTAAGTGAAGGTTAACGAAGTTGAAAGAAATGAACAAGCATGTTAGATGGATGAGATCTTTGCATGATTACATGACTCCATACGTTTCTAAGTCTCCAAGAGGTGCTTACTTGA<sup>A</sup>CTACAGAGATTTGGATTTGGGTCTACTAAGGGTATTAACTTCTTTTGAAGATGCTAGAAAGTGGGTGAAACTTACTTTAAGGGTAACTTTAAGAGATTGGTTTGGTTAAGGGTAAGATTGATCCA<sup>A</sup>ACTA<sup>A</sup>CTTTTTAGAAACGAACAATCTATTCCACCATTGTTTTAAICTAGA

**Table S1. ATG code of 73 different class III PODs from *A. thaliana*.** In the table, the ATG codes of the Arabidopsis class III PODs (*PER1-73*) used in the heatmap (Fig. S5) are reported. bioRxiv preprint doi: <https://doi.org/10.1101/2022.04.15.488465>; this version posted April 15, 2022. The copyright holder for this preprint (which was not certified by peer review) is the author/funder, who has granted bioRxiv a license to display the preprint in perpetuity. It is made available under a [CC-BY-NC-ND 4.0 International license](https://creativecommons.org/licenses/by-nc-nd/4.0/).

| ATG code  | Gene name    |
|-----------|--------------|
| AT1G05240 | <i>PER1</i>  |
| AT1G05250 | <i>PER2</i>  |
| AT1G05260 | <i>PER3</i>  |
| AT1G14540 | <i>PER4</i>  |
| AT1G14550 | <i>PER5</i>  |
| AT1G24110 | <i>PER6</i>  |
| AT1G30870 | <i>PER7</i>  |
| AT1G34510 | <i>PER8</i>  |
| AT1G44970 | <i>PER9</i>  |
| AT1G49570 | <i>PER10</i> |
| AT1G68850 | <i>PER11</i> |
| AT1G71695 | <i>PER12</i> |
| AT1G77100 | <i>PER13</i> |
| AT2G18140 | <i>PER14</i> |
| AT2G18150 | <i>PER15</i> |
| AT2G18980 | <i>PER16</i> |
| AT2G22420 | <i>PER17</i> |
| AT2G24800 | <i>PER18</i> |
| AT2G34060 | <i>PER19</i> |
| AT2G35380 | <i>PER20</i> |
| AT2G37130 | <i>PER21</i> |
| AT2G38380 | <i>PER22</i> |
| AT2G38390 | <i>PER23</i> |
| AT2G39040 | <i>PER24</i> |
| AT2G41480 | <i>PER25</i> |
| AT2G43480 | <i>PER26</i> |
| AT3G01190 | <i>PER27</i> |
| AT3G03670 | <i>PER28</i> |
| AT3G17070 | <i>PER29</i> |
| AT3G21770 | <i>PER30</i> |
| AT3G28200 | <i>PER31</i> |
| AT3G32980 | <i>PER32</i> |
| AT3G49110 | <i>PER33</i> |
| AT3G49120 | <i>PER34</i> |
| AT3G49960 | <i>PER35</i> |
| AT3G50990 | <i>PER36</i> |
| AT4G08770 | <i>PER37</i> |

| ATG code  | Gene name    |
|-----------|--------------|
| AT4G08780 | <i>PER38</i> |
| AT4G11290 | <i>PER39</i> |
| AT4G16270 | <i>PER40</i> |
| AT4G17690 | <i>PER41</i> |
| AT4G21960 | <i>PER42</i> |
| AT4G25980 | <i>PER43</i> |
| AT4G26010 | <i>PER44</i> |
| AT4G30170 | <i>PER45</i> |
| AT4G31760 | <i>PER46</i> |
| AT4G33420 | <i>PER47</i> |
| AT4G33870 | <i>PER48</i> |
| AT4G36430 | <i>PER49</i> |
| AT4G37520 | <i>PER50</i> |
| AT5G05340 | <i>PER51</i> |
| AT4G37530 | <i>PER52</i> |
| AT5G06720 | <i>PER53</i> |
| AT5G06730 | <i>PER54</i> |
| AT5G14130 | <i>PER55</i> |
| AT5G15180 | <i>PER56</i> |
| AT5G17820 | <i>PER57</i> |
| AT5G19880 | <i>PER58</i> |
| AT5G19890 | <i>PER59</i> |
| AT5G22410 | <i>PER60</i> |
| AT5G24070 | <i>PER61</i> |
| AT5G39580 | <i>PER62</i> |
| AT5G40150 | <i>PER63</i> |
| AT5G42180 | <i>PER64</i> |
| AT5G47000 | <i>PER65</i> |
| AT5G51890 | <i>PER66</i> |
| AT5G58390 | <i>PER67</i> |
| AT5G58400 | <i>PER68</i> |
| AT5G64100 | <i>PER69</i> |
| AT5G64110 | <i>PER70</i> |
| AT5G64120 | <i>PER71</i> |
| AT5G66390 | <i>PER72</i> |
| AT5G67400 | <i>PER73</i> |



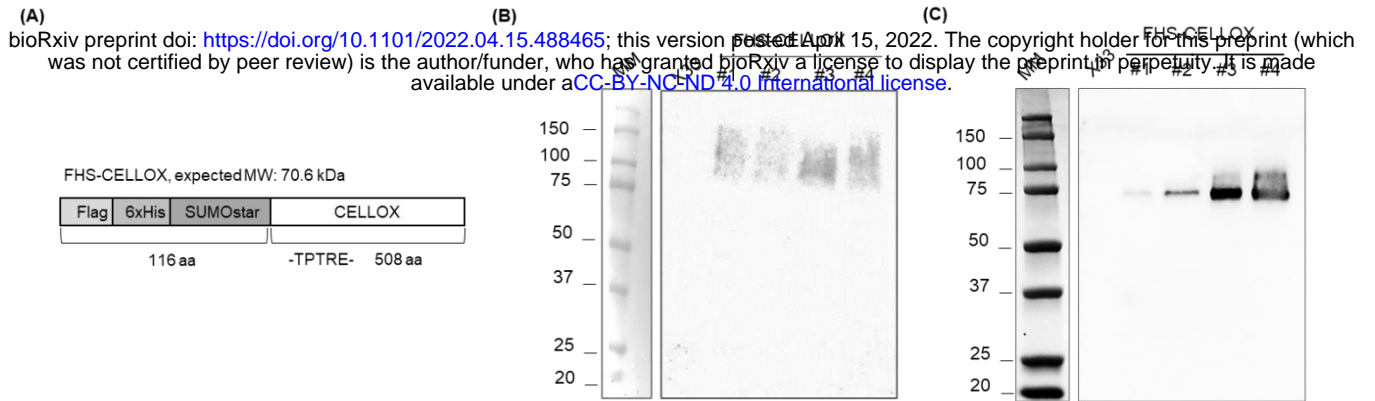

**Fig. S1. Heterologous expression of FHS-CELLOX in *P. pastoris*.** (A) Schematic representation of Flag-His-SUMOstar-tagged CELLOX, referred to as FHS-CELLOX. In the scheme, the starting amino acid sequence of mature CELLOX (-TPTRE-) was fused downstream of Flag-His-SUMOstar-tag. (B) Immunodecoration analysis of the raw cultures filtrates from four different (#1-4) *P. pastoris* transformants expressing FHS-CELLOX. (C) Immunodecoration analysis of the same culture filtrates shown in (B) upon deglycosylation with PNGase F. The (B) raw and (C) PNGase F-treated culture filtrates of wild type *P. pastoris* (X33) were used as negative controls. Molecular weight marker (MM) is also reported.

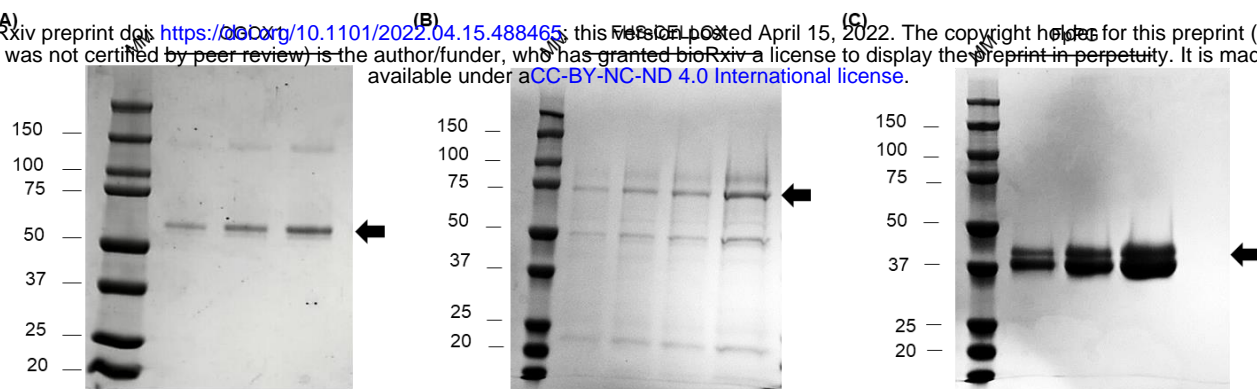

**Fig. S2. Purification of the enzymes heterologously expressed in *P. pastoris*.** SDS-PAGE/Coomassie blue staining analysis of different amounts of purified (A) OGOX1, (B) FHS-CELLOX upon deglycosylation with PNGase F and (C) FpPG. (A-C) Black arrows point to the bands corresponding to (A) OGOX1, (B) FHS-CELLOX and (C) FpPG. Molecular weight marker (MM) is also reported. [FHS-CELLOX: Flag-His-SUMOstar-tagged CD-oxidase from *A. thaliana*, FpPG: endopolygalacturonase from *F. phyllophilum*, OGOX1: His-tagged OG-oxidase 1 from *A. thaliana*].

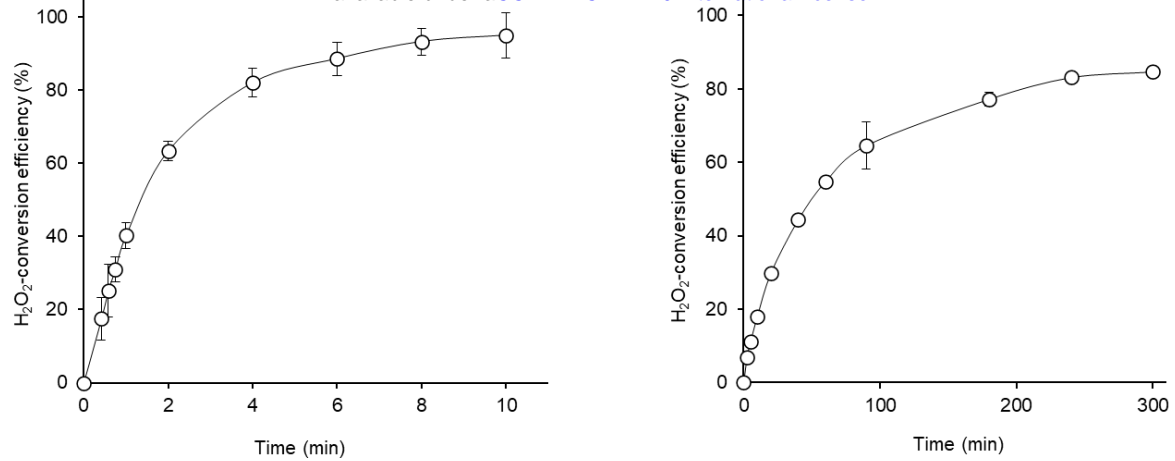

**Fig. S3. H<sub>2</sub>O<sub>2</sub>-conversion efficiency of OGOX1 and FHS-CELLOX.** The H<sub>2</sub>O<sub>2</sub>-conversion efficiency of (A) OGOX1 and (B) FHS-CELLOX was evaluated by measuring the production of H<sub>2</sub>O<sub>2</sub> in the presence of 15  $\mu$ M penta-galacturonic oligosaccharide or cello-triose, respectively, by using the orange xylenol assay. Values are mean  $\pm$  s.d. (n= 3). [FHS-CELLOX: Flag-His-SUMOstar-tagged CD-oxidase from *A. thaliana*, OGOX1: His-tagged OG-oxidase 1 from *A. thaliana*].

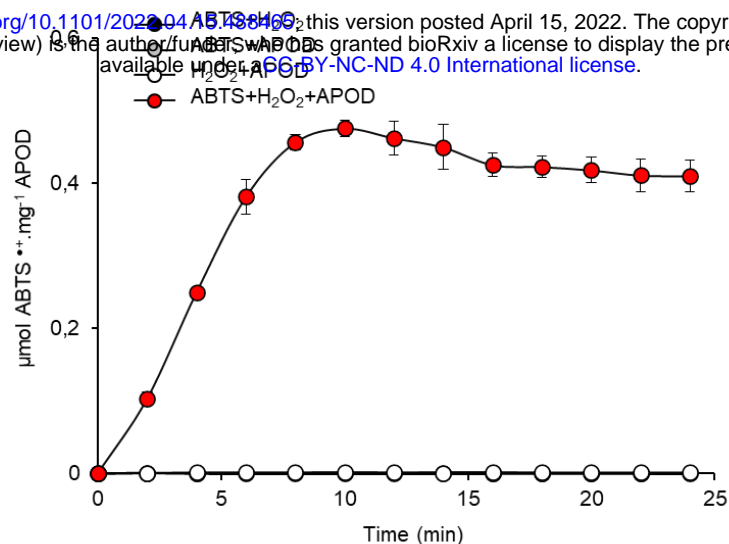

**Fig. S4. Determination of ABTS-oxidizing activity of APOD from ripe tomato fruit.** ABTS-oxidizing activity of an anionic peroxidase preparation from ripe tomato fruit extract (APOD) in the presence of 50  $\mu\text{M}$   $\text{H}_2\text{O}_2$  as determined by ABTS-APOD coupled assay. Values are mean  $\pm$  s.d. ( $n=3$ ). The kinetics relative to the samples (ABTS+ $\text{H}_2\text{O}_2$ ) and (ABTS+APOD) superpose with that of the sample ( $\text{H}_2\text{O}_2$ +APOD). [ABTS: 2,2'-azino-bis-(3-ethylbenzothiazoline-6-sulfonic acid), APOD: anionic peroxidase preparation from ripe tomato fruit].

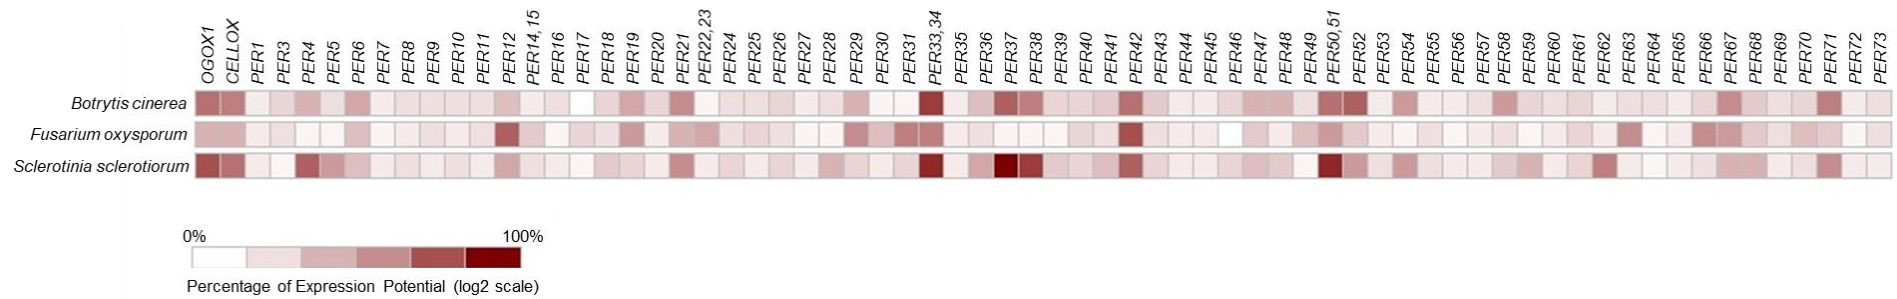

**Fig. S5. Heatmap of gene expression levels of OGOX1, CELLOX and different class III PODs from *A. thaliana*.** The columns of the heatmap represent genes (OGOX1-, CELLOX- and different class III POD-encoding genes) whereas the rows represent the experimental conditions (three different fungal infections on *A. thaliana* Col-0, n= 1, 48h post-inoculation). Each cell is colored in different red intensities based on the level of expression of that gene in that sample. *PER2* is not available. Further details on plant PODs (PER1-73) used in the analysis are reported in Table S1. Heatmap has been created by <https://genevestigator.com/>. [CELLOX: CD-oxidase, AT4G20860; OGOX1: OG-oxidase 1, AT4G20830; POD: Peroxidase].
